# Supplementary material for: Discrete viral E2 lysine residues and scavenger receptor MARCO are required for clearance of circulating alphaviruses
Source: eLife. 2019 Oct 9;8:e49163. doi: 10.7554/eLife.49163 (PMC6839921; doi:10.7554/eLife.49163)
Supplement: Figure 1—source data 1. [file elife-49163-fig1-data1.xlsx]

## Sheet: 1A
	Genomes (Log10)		Genomes per 20ul (Log10)
	CHIKV Input		PLL	CLL
	7.21332		2.47712	5.50571
	7.84143		2.70638	5.85206
			2.56397	5.81065
			2.47712	6.21213
			2.47712	6.19439
			2.47712	5.95168
			2.47712	6.25207

## Sheet: 1B
	Genomes (Log10)		Genomes per 20ul (Log10)
	RRV Input		PLL	CLL
	7.77		2.81324	7.09097
	8.23971		3.32018	7.31461
			3.57844	7.3245
			2.64091	6.83933
			2.47712	6.65162
			2.54912	6.31726
			2.56445	6.92448

## Sheet: 1C
	PFU (Log10)		PFU per 20ul (Log10)
	ONNV Input		PLL	CLL
	5.27875		0	3.51851
	5.44326		0	3.61278
			0	3.73239
			0	3.69897
			0	2.83251
			0	3.04139
			0	2.92942
