# Supplementary material for: Discrete viral E2 lysine residues and scavenger receptor MARCO are required for clearance of circulating alphaviruses
Source: eLife. 2019 Oct 9;8:e49163. doi: 10.7554/eLife.49163 (PMC6839921; doi:10.7554/eLife.49163)
Supplement: Figure 2—source data 1. [file elife-49163-fig2-data1.xlsx]

## Sheet: 2A
			Genomes per 20ul (Log10)
	CHIKV Input (Genomes (Log10)		Sham	Splenectomized
	8.14473		3.47	4.58556
	7		3.47	3.88477
			4.18866	4.26397
			2.47712	2.47712
			2.47712	2.47712
			2.47712	2.47712

## Sheet: 2B
			Genomes per 20ul (Log10)
	CHIKV Input (Genomes (Log10)		PLL	CLL
	7.58285		2.47712	6.21507
	7.73763		2.74149	6.32921
			2.82761	6.58609
			3.43793	6.16051
			3.1145	6.10669
			2.47712	6.02135

## Sheet: 2C
			Genomes (Log 10)	Genomes per 20ul (Log10)
			CHIKV Input	Plasma		Liver		Spleen		Lung
				PLL	CLL	PLL	CLL	PLL	CLL	PLL	CLL
			8.08558	2.6239	6.12659	6.98521	6.26985	5.61388	6.46826	4.99946	6.32771
			8.22997	3.09839	6.11272	6.45593	6.51987	5.74048	6.53282	5.15542	5.69605
				2.71413	6.21407	6.89639	6.0323	5.63733	6.6932	5.39765	5.99609
				2.47712	6.16225	7.14525	6.11771	6.06049	6.60886	5.42688	5.89033
				3.24777	6.17818	6.98825	6.45498	5.7809	6.44071	5.37927	5.97599
				2.47712	5.88313	6.99764	6.32444	5.57953	7.13331	5.30387	5.43578
				2.47712	5.84326	7.21017	6.00078	6.13052	7.25213	5.35292	6.1286
				2.47712	5.73814	7.77896	6.25214	6.29555	7.18026	5.38677	6.2697
				2.90568	6.03441	7.20117	6.06493	6.0865	6.92914	5.74458	5.80195
