# Supplementary material for: Discrete viral E2 lysine residues and scavenger receptor MARCO are required for clearance of circulating alphaviruses
Source: eLife. 2019 Oct 9;8:e49163. doi: 10.7554/eLife.49163 (PMC6839921; doi:10.7554/eLife.49163)
Supplement: Figure 3—source data 1. [file elife-49163-fig3-data1.xlsx]

## Sheet: 3A
CHIKV	Genomes (Log10)	Input	7.01583	7.34913
	Genomes per 20ul (Log10)	WT	3.77418	3.47712	3.47712	4.01058	2.47712	2.47712	2.47712	2.47712
		C3-/-	3.47712	3.47712	3.47712	2.73649	2.94411	2.47712	2.58332	2.47712
RRV	Genomes (Log10)	Input	8.01602	8.10842
	Genomes per 20ul (Log10)	WT	3.38649	3.82338	3.80573	3.24449	3.48421	4.09018
		C3-/-	2.98774	3.34972	3.46844	3.97224	2.51984	3.3369

## Sheet: 3B
CHIKV	Genomes (Log10)	Input	7.84877	7.37876
	Genomes per 20ul (Log10)	WT	3.24168	3.04424	2.9398	2.47712	2.47712	2.47712	2.47712
		uMT	3.40863	2.99812	2.97176	2.66674	2.47712	2.47712	2.47712
RRV	Genomes (Log10)	Input	8.06062	8.05613
	Genomes per 20ul (Log10)	WT	3.82449	3.76202	3.57601	3.79065	3.69778	3.82429	3.94643
		uMT	3.98222	2.75602	3.63366	2.47712	4.15833	3.84301	4.331	3.65136

## Sheet: 3C
CHIKV	Genomes (Log10)	Input	7.62154	7.56595
	Genomes per 20ul (Log10)	poly(C)	3.19026	3.41251	2.97427	2.47712	2.97025	3.06543	3.13282
		poly(I)	5.72725	6.04456	5.9237	6.26095	6.50544	6.38591	6.45564
RRV	Genomes (Log10)	Input	7.802	8.04195
	Genomes per 20ul (Log10)	poly(C)	3.03384	4.02846	3.94242	3.84575	3.88601	3.96163
		poly(I)	6.26425	6.00922	6.9738	6.44145	6.32934	5.77083

## Sheet: 3D
CHIKV	Genomes (Log10)	Input	8.13919	7.62239
	Genomes per 20ul (Log10)	Dextran	2.78597	2.47712	2.75578	3.01272	2.47712	2.47712	2.47712	2.47712
		Dextran Sulfate	6.13666	6.08041	4.93489	6.31534	5.73465	5.91584	5.79212	5.7902
RRV	Genomes (Log10)	Input	8.374	8.0742
	Genomes per 20ul (Log10)	Dextran	3.97339	4.07021	3.69751	4.04897	3.7167	3.9296	3.11751
		Dextran Sulfate	7.00342	7.03796	6.77071	6.46991	6.75879	6.74294	6.89263

## Sheet: 3E
SRA1-/- mice
CHIKV	Genomes (Log10)	Input	7.54049	7.67236
	Genomes per 20ul (Log10)	poly(c)	2.47712	2.9315	2.90434	2.97572	2.47712
		poly(I)	5.53856	6.05763	5.85189	6.10896	5.87701	6.50134

## Sheet: 3F
CHIKV	Genomes (Log10)	Input	8.0506	8.17956
	Genomes per 20ul (Log10)	WT	3.54678	3.27374	2.47712	2.47712	2.47712	2.84784	3.21547	3.58785
		MARCO-/-	6.69469	7.11901	6.60389	6.17439	6.60815	6.65438	6.54151	6.62269	6.65821	6.69783	6.58404

## Sheet: 3G
CHIKV	Genomes (Log10)	Input		9.55071
	Genomes per 20ul (Log10)	WT	PLL	4.13299	4.18067	3.96784	4.21834
			CLL	7.85019	7.90415	7.71077	8.07604
		MARCO-/-	PLL	8.33579	8.11738	8.21347	8.1739
			CLL	7.93165	7.74152	7.66161

## Sheet: 3I
	Average per Mouse
	F4/80+ cells per HPF	WT	PLL	54	63.7	52.4	56.3
			CLL	1.6	0.3	0.2	0.1
		MARCO-/-	PLL	52.8	55.5	52.8	54.6
			CLL	0.5	0.4	0.3
	COUNTS
				F4/80+ Cells per Section #
	Sample	Genotype	Treatment	1	2	3	4	5	6	7	8	9	10	Average
	1	WT	PLL	56	65	51	54	57	49	56	46	51	55	54	56.6
	2			58	72	88	57	55	65	47	69	64	62	63.7
	3			55	53	46	45	47	55	48	67	51	57	52.4
	4			62	55	68	48	54	57	51	54	57	57	56.3
	5	WT	CLL	0	4	2	6	0	4	0	0	0	0	1.6	0.55
	6			0	0	0	0	0	2	0	0	1	0	0.3
	7			0	0	0	0	2	0	0	0	0	0	0.2
	8			0	0	0	0	0	0	0	0	0	1	0.1
	9	MARCO-/-	PLL	43	65	51	59	50	47	53	54	58	48	52.8	53.925
	10			60	66	61	39	50	60	60	58	51	50	55.5
	11			49	46	50	54	65	48	56	65	48	47	52.8
	12			63	48	50	42	57	62	48	64	62	50	54.6
	13	MARCO-/-	CLL	0	2	0	0	0	2	0	1	0	0	0.5	0.4
	14			0	0	0	0	1	0	1	0	2	0	0.4
	15			1	0	0	1	0	0	0	0	0	1	0.3
