# Supplementary material for: Discrete viral E2 lysine residues and scavenger receptor MARCO are required for clearance of circulating alphaviruses
Source: eLife. 2019 Oct 9;8:e49163. doi: 10.7554/eLife.49163 (PMC6839921; doi:10.7554/eLife.49163)
Supplement: Figure 4—source data 1. [file elife-49163-fig4-data1.xlsx]

## Sheet: 4A
		WT CHIKV						CHIKV E2 K200R
	CHIKV Input (Genomes Log10)	7.61114	7.05668	7.64793				7.79986	7.3911	7.91258
	Minutes post inoculation	Genomes per 20ul (Log10)
		WT CHIKV						CHIKV E2 K200R
	15	4.59889	5.41115	5.39804	4.86196	4.97196	5.48801	6.79191	6.56631	6.37556	6.6718	6.36799	6.58363
	30	3.63365	4.10969	3.06258	3.47712	3.75686	3.84408	6.17439	6.62286	6.58235	6.66996	6.80175	5.93048
	45	3.47712	3.5445	3.55575	3.59893	3.47712	3.47712	6.53157	6.61559	6.31761	6.47901	6.34296	6.60019
	60	3.47712	3.47712	3.47712	3.47712	3.47712	3.47712	6.408	6.43594	6.56144	6.54513	6.42157	6.50015

## Sheet: 4B
	CHIKV						CHIKVE2 K200R
Input (Genomes Log10)	8.58369	8.25201					8.30825	8.03937
	CHIKV						CHIKVE2 K200R
Genomes per 20ul (Log10)	3.52539	3.55829	3.60359	3.30098	3.89646	3.5351	6.47381	6.42222	6.32214	6.56901	6.46632	6.45997

## Sheet: 4C
	Genomes (Log10)
	CHIKV								CHIKVE2 K200R
Input	7.84143	8.09933							7.40282	8.36133
	Genomes per 20ul (Log10)
	CHIKV								CHIKVE2 K200R
PLL	2.47712	2.47712	2.47712	2.47712	2.89782	2.47712	2.47712	2.47712	5.97372	5.94582	5.1538	5.70692	6.50213	6.75886	6.66936	6.6403
CLL	5.57019	5.55554	5.83255	5.69013	6.40458	6.98673	6.43381	6.40403	5.92924	5.8109	5.88282	6.06943	6.795	6.62753	6.72402	6.54977

## Sheet: 4D
		WT			E2 K200R
99659	Input (Genomes Log 10)	7.38834			7.63268
	Serum (Genomes per 20ul Log10)	3.33122	3.23179	3.85245	6.26227	6.04434	6.09697
SL15649	Input (Genomes Log 10)	7.03404			7.55492
	Serum (Genomes per 20ul Log10)	3.29022	2.47712	2.94984	6.05153	5.91781	6.13111
		WT			E2 K200R
37997	Input (FFU Log 10)	4.6902			4.53148
	Serum (FFU per 20ul Log10)	0.60206	0.60206	0.60206	2.64345	2.88081	2.5563
		WT			E2 K200R
SG650	Input (PFU Log10)	5.65321			5.81291
	Serum (PFU per 20ul Log10)	0.30103	0.30103	0.845098	3.45484	3.04139	3
