# Supplementary material for: Discrete viral E2 lysine residues and scavenger receptor MARCO are required for clearance of circulating alphaviruses
Source: eLife. 2019 Oct 9;8:e49163. doi: 10.7554/eLife.49163 (PMC6839921; doi:10.7554/eLife.49163)
Supplement: Figure 5—source data 1. [file elife-49163-fig5-data1.xlsx]

## Sheet: 5A
	L. Ankle (FFU/g Log10)		R. Ankle (FFU/g Log10)		Serum (FFU/ml Log10)
	AF15561	AF15561E2 K200R	AF15561	AF15561E2 K200R	AF15561	AF15561E2 K200R
	7.96013	7.7253	3.49013	6.21884	3.69011	5.97712
	7.88039	7.53933	3.49013	5.64654	4.35341	5.99114
	7.8617	7.86679	3.49013	6.53137	3.61265	6.21183
	8.1347	7.82391	3.49013	5.64509	4.12083	5.42867
	7.84393	7.43888	3.49013	7.59686	3.78055	6.7108
	L. Ankle (FFU/g Log10)		R. Ankle (FFU/g Log10)		Serum (FFU/ml Log10)
	99659	99659E2 K200R	99659	99659E2 K200R	99659	99659E2 K200R
	7.01931	7.79321	3.55	4.96524	4.1015	5.02461
	7.24565	7.30325	3.55	5.26378	2.30103	5.34056
	6.85631	7.44419	3.55	5.57296	2.60206	5.12764
	7.49732	7.46292	3.81673	5.55337	3.07918	5.33697
	7.40988	7.34082	3.55	5.25457	2.60206	5.59092
	7.70437	7.07684	3.55	4.60206	3.68124	5.18218
	7.20242	7.21388	3.55	5.5345	4.17545	5.716
	7.55189	7.53057	3.55	5.69897	3.15051	5.05293
	6.96524	7.37959	3.55	4.46736	3.22358	5.08978
	L. Ankle (FFU/g Log10)		R. Ankle (FFU/g Log10)		Serum (FFU/ml Log10)
	SL15649	SL15649E2 K200R	SL15649	SL15649E2 K200R	SL15649	SL15649E2 K200R
	6.65896	6.79727	3.46835	3.71012	3.89927	5.13033
	7.11059	6.43457	3.46835	3.48144	4.15534	4.42651
	6.83123	6.57864	3.4624	5.21219	3.17609	4.48287
	6.57634	7.27184	3.46835	3.73878	2.30103	5.99123
	7.02531	7.22531	3.48855	4.17319	3.07918	4.96942
	6.70243	6.85854	3.52244	3.79588	2.30103	5.04139
	L. Ankle (PFU/g Log10)		R. Ankle (PFU/g Log10)		Serum (PFU/ml Log10)
	ONNV	ONNVK200R	ONNV	ONNVK200R	ONNV	ONNVK200R
	7.19382	6.68473	2.96658	4.53557	3.53466	5.16137
	5.88606	6.00877	2.87943	4.10474	3.41078	4.96614
	6.04576	6.46009	3.00877	3.97434	3.60206	5.07918
	7.07255	5.95861	2.96658	4.01773	3.29003	5.273
	6.50399	6.64207	3.04576	3.18709	3.60206	4.75967
	6.89963	6.78989	2.92812	4.93418	3.1383	5.8451
	6.85387	6.14874	2.82391	5.28597	3.81291	5.22401
	6.51713	6.30103	2.87943	4.68674	3.15381	4.8293
	6.77469	6.90658	3.02687	5.1107	3.45864	5.21748
	6.7508	6.33724	2.86646	4.14267	3.35698	5.07004

## Sheet: 5B
	L. Ankle (FFU/g Log10)				R. Ankle (FFU/g Log10)				R. Quad (FFU/g Log10)				Serum (FFU/ml Log10)
	CHIKV		CHIKV E2 K200R		CHIKV		CHIKV E2 K200R		CHIKV		CHIKV E2 K200R		CHIKV		CHIKV E2 K200R
	WT	MARCO-/-	WT		WT	MARCO-/-	WT		WT	MARCO-/-	WT		WT	MARCO-/-	WT
	7.92677	7.88696	8.21037		3.54262	6.85194	6.41814		3.49894	6.56067	5.66597		3.22	6.35	6.33
	8.11776	7.9833	7.97772		3.54262	6.34523	6.77815		3.49894	6.68921	6.74172		3.52	6.39	6.87
	7.67778	7.64098	8.03652		3.54262	6.78116	6.46073		3.49894	6.19713	6.27837		3	6.97	6.4
	7.90503	7.71476	8.20687		3.82391	6.37196	6.42963		3.49894	6.25311	6.22538		4.27	6.45	6.63
	7.89311	7.45646	7.70522		3.54262	6.19552	6.26712		3.73283	6.39987	5.34933		4.08	6.45	6.24
	7.48734	7.44777	7.7253		3.55399	5.67863	5.65665		3.55026	5.98135	5.46584		4.66359	6.5536	6.30103
	7.40866	7.6361	7.68733		3.55399	6.27729	6.27509		3.55026	6.44716	4.98621		3.44041	6.7297	6.50852
	7.32	7.47017	8		3.55399	6.25828	7.35513		3.55026	5.53026	6.48064		4.11148	6.7297	6.88021
	7.31315	7.63202	7.76479		3.55399	6.07506	6.22314		3.55026	6.30103	6.19779		3.64345		6.48189
