# Supplementary material for: Discrete viral E2 lysine residues and scavenger receptor MARCO are required for clearance of circulating alphaviruses
Source: eLife. 2019 Oct 9;8:e49163. doi: 10.7554/eLife.49163 (PMC6839921; doi:10.7554/eLife.49163)
Supplement: Figure 6—source data 1. [file elife-49163-fig6-data1.xlsx]

## Sheet: 6A
		FFU/ml (Log10)
		Body		Legs		Saliva
		CHIKV	CHIKV E2 K200R	CHIKV	CHIKV E2 K200R	CHIKV	CHIKV E2 K200R
		4.24088	5.62936	5.30671	4.28252	2.30103	2.30103
		3.5	2.30103	5.32815	5.17125	2.30103	2.30103
		2.77815	2.60206	5.03073	5.01671	2.30103	2.30103
		6.19441	2.30103	5.23414	4.83512	2.30103	2.95154
		5.8962	5.85065	2.30103	3.22358	2.30103	2.30103
		5.9841	2.60206	2.95154	4.84062	2.30103
		2.30103	2.60206	4.94041	2.30103	2.30103
		2.30103	2.30103	4.66723		2.30103
		2.95154	3.78342	2.30103
		2.30103	2.60206	3.22358
		2.30103	6.20857	2.30103
		2.30103	3.78342
		3.99409	4.86042
		4.18543	4.48321
		2.30103	6.71728
		6.29972	4.05831
		3.90309	3.79885
		2.60206	2.95154
		3.03959	6.27104
		4.49716	3.10206
		2.30103	3.30103
		4.73517	2.95154
		2.30103	2.30103
		6.25104	2.80103
		3.60206	2.30103
		3.30103	3.47224
		3.46007	3.66076
		4.44266	2.77815
		3.30103	3.57918
		2.30103	3.19011
		6.29987	5.95585
		2.30103	3.10206
		2.30103	3.95244
		3.30103	2.30103
		3.97337	2.95154
		3.71945	2.30103
		3.89375
		4.28318
		4.01221
		2.30103
		3.30103
		4.04953

## Sheet: 6B
	C6/36 (Percent band intensity)
		CHIKV-ApaI			CHIKV
	Input	65.65			34.35
	P5	71.1	71.37	73.51	28.9	28.63	26.49
		CHIKV-ApaI			CHIKVE2 K200R
	Input	66.93			33.07
	P5	65.74	67.2	66.03	34.26	32.8	33.97

## Sheet: 6C
	Bodies- percent band intensities
		CHIKV-ApaI																				CHIKV
	Input	59	56																			41	44
	Day 7	70	55	76	61	64	61	67	76	64	62	70	68	66	59	58	67	62	54	75		30	45	24	39	36	39	32	24	36	38	30	32	34	41	42	33	38	46	25
		CHIKV-ApaI																				CHIKV E2 K200R
	Input	58	64																			42	36
	Day 7	81	58	74	51	83	66	66	61	59	58	72	50	69	66	35	69	61	68	77	86	19	42	26	49	17	34	34	39	41	42	28	50	31	34	65	31	39	32	23	14

## Sheet: 6D
	Saliva- percent band intensities
		CHIKV-ApaI																				CHIKV
	Input	59	56																			41	44
	Day 7	70	55	76	61	64	61	67	76	64	62	70	68	66	59	58	67	62	54	75		30	45	24	39	36	39	32	24	36	38	30	32	34	41	42	33	38	46	25
		CHIKV-ApaI																				CHIKV E2 K200R
	Input	58	64																			42	36
	Day 7	81	58	74	51	83	66	66	61	59	58	72	50	69	66	35	69	61	68	77	86	19	42	26	49	17	34	34	39	41	42	28	50	31	34	65	31	39	32	23	14
