# Supplementary material for: Discrete viral E2 lysine residues and scavenger receptor MARCO are required for clearance of circulating alphaviruses
Source: eLife. 2019 Oct 9;8:e49163. doi: 10.7554/eLife.49163 (PMC6839921; doi:10.7554/eLife.49163)
Supplement: Figure 7—source data 1. [file elife-49163-fig7-data1.xlsx]

## Sheet: 7A
	T48
	Input (Genomes Log10)	7.30503	7.16067
	PLL (Genomes per 20ul Log10)	5.35058	5.38581	5.36991	5.6419	5.6413	5.60725
	CLL (Genomes per 20ul Log10)	5.82504	5.82469	5.64762	6.17173	6.16892	5.86502
	DC5692
	Input (Genomes Log10)	7.10867	7.21703
	PLL (Genomes per 20ul Log10)	3.02857	3.02511	2.70092	2.68607	3.05059	2.70863	3.03887
	CLL (Genomes per 20ul Log10)	5.60996	5.99259	6.03699	6.05189	5.77614	6.00147	6.16694

## Sheet: 7B
	Inputs (Genomes Log10)
	T48	T48E2 R251K	DC5692	DC5692E2 K251R
	6.69589	6.93959	6.49031	6.79988
	7.2102	7.08688	6.31994	6.49151
	Genomes per 20ul (Log10)
	T48						T48E2 R251K						DC5692						DC5692E2 K251R
	5.09502	5.28266	5.31326	5.74525	5.64095	5.6841	2.91413	2.62686	3.00603	3.04171	3.05326	2.97701	2.47712	2.47712	2.47712	2.47712	2.55267	2.90036	5.35938	5.37883	5.30444	5.1066	5.08028	5.03812
