# Supplementary material for: Discrete viral E2 lysine residues and scavenger receptor MARCO are required for clearance of circulating alphaviruses
Source: eLife. 2019 Oct 9;8:e49163. doi: 10.7554/eLife.49163 (PMC6839921; doi:10.7554/eLife.49163)
Supplement: Figure 8—source data 1. [file elife-49163-fig8-data1.xlsx]

## Sheet: 8B
	CHIKV E2 200 mutants
		K	R	H	D	A	L	Q	S
	Input (Genomes Log10)	7.81863	8.27911	8.64736	8.72517	8.66815	8.66314	8.00281	8.0539
		K	R	H	D	A	L	Q	S
	Genomes per 20ul (Log10)	3.47712	6.93133	7.31043	7.44141	7.44881	7.1973	6.7636	6.58549
		3.49532	6.52921	7.72844	7.39064	7.45124	7.90329	7.34162	6.91904
		3.53054	7.14844	7.35547	7.51428	7.56669	7.48237	7.16184	6.87283
		3.47712	7.11142	7.2326	7.04865	7.9847	7.16512	6.94342	6.84458

## Sheet: 8C
		RRV E2 251 mutants
		K	R	D	A	Q	S
	Input (Genomes Log10)	7.33105	7.41661	7.18204	7.48859	6.99321	7.2516
		K	R	D	A	Q	S
	Genomes per 20ul (Log10)	3.50225	6.71906	6.2533	6.55002	6.69393	6.25211
		3.26763	6.35641	6.23244	6.78017	6.30201	6.50156
		3.43557	6.199	6.31712	6.29778	6.03261	6.2266
		2.89183	6.06931	6.41579	6.38593	6.14544	6.12611

## Sheet: 8D
	Inputs (Genomes Log10)
	CHIKV	CHIKVE2 K252R
	7.55119	7.18225
	7.63585	7.70994
	Genomes per 20ul Log10
	CHIKV								CHIKVE2 K252R
	3.15854	2.47712	2.9633	2.47712	2.47712	2.47712	3.30991	2.64361	2.87507	3.14314	2.94001	2.47712	2.47712	2.47712	2.63837	2.47712
